# Supplementary figures and images for: Dexamethasone alleviates acute lung injury in a rat model with venovenous extracorporeal membrane oxygenation support
Source: PubMed Central journal article supplement — BMJ Open Respir Res. 2024 Dec 4;11(1):e002394. doi: 10.1136/bmjresp-2024-002394 (PMC11624713; doi:10.1136/bmjresp-2024-002394), 2024-12-04

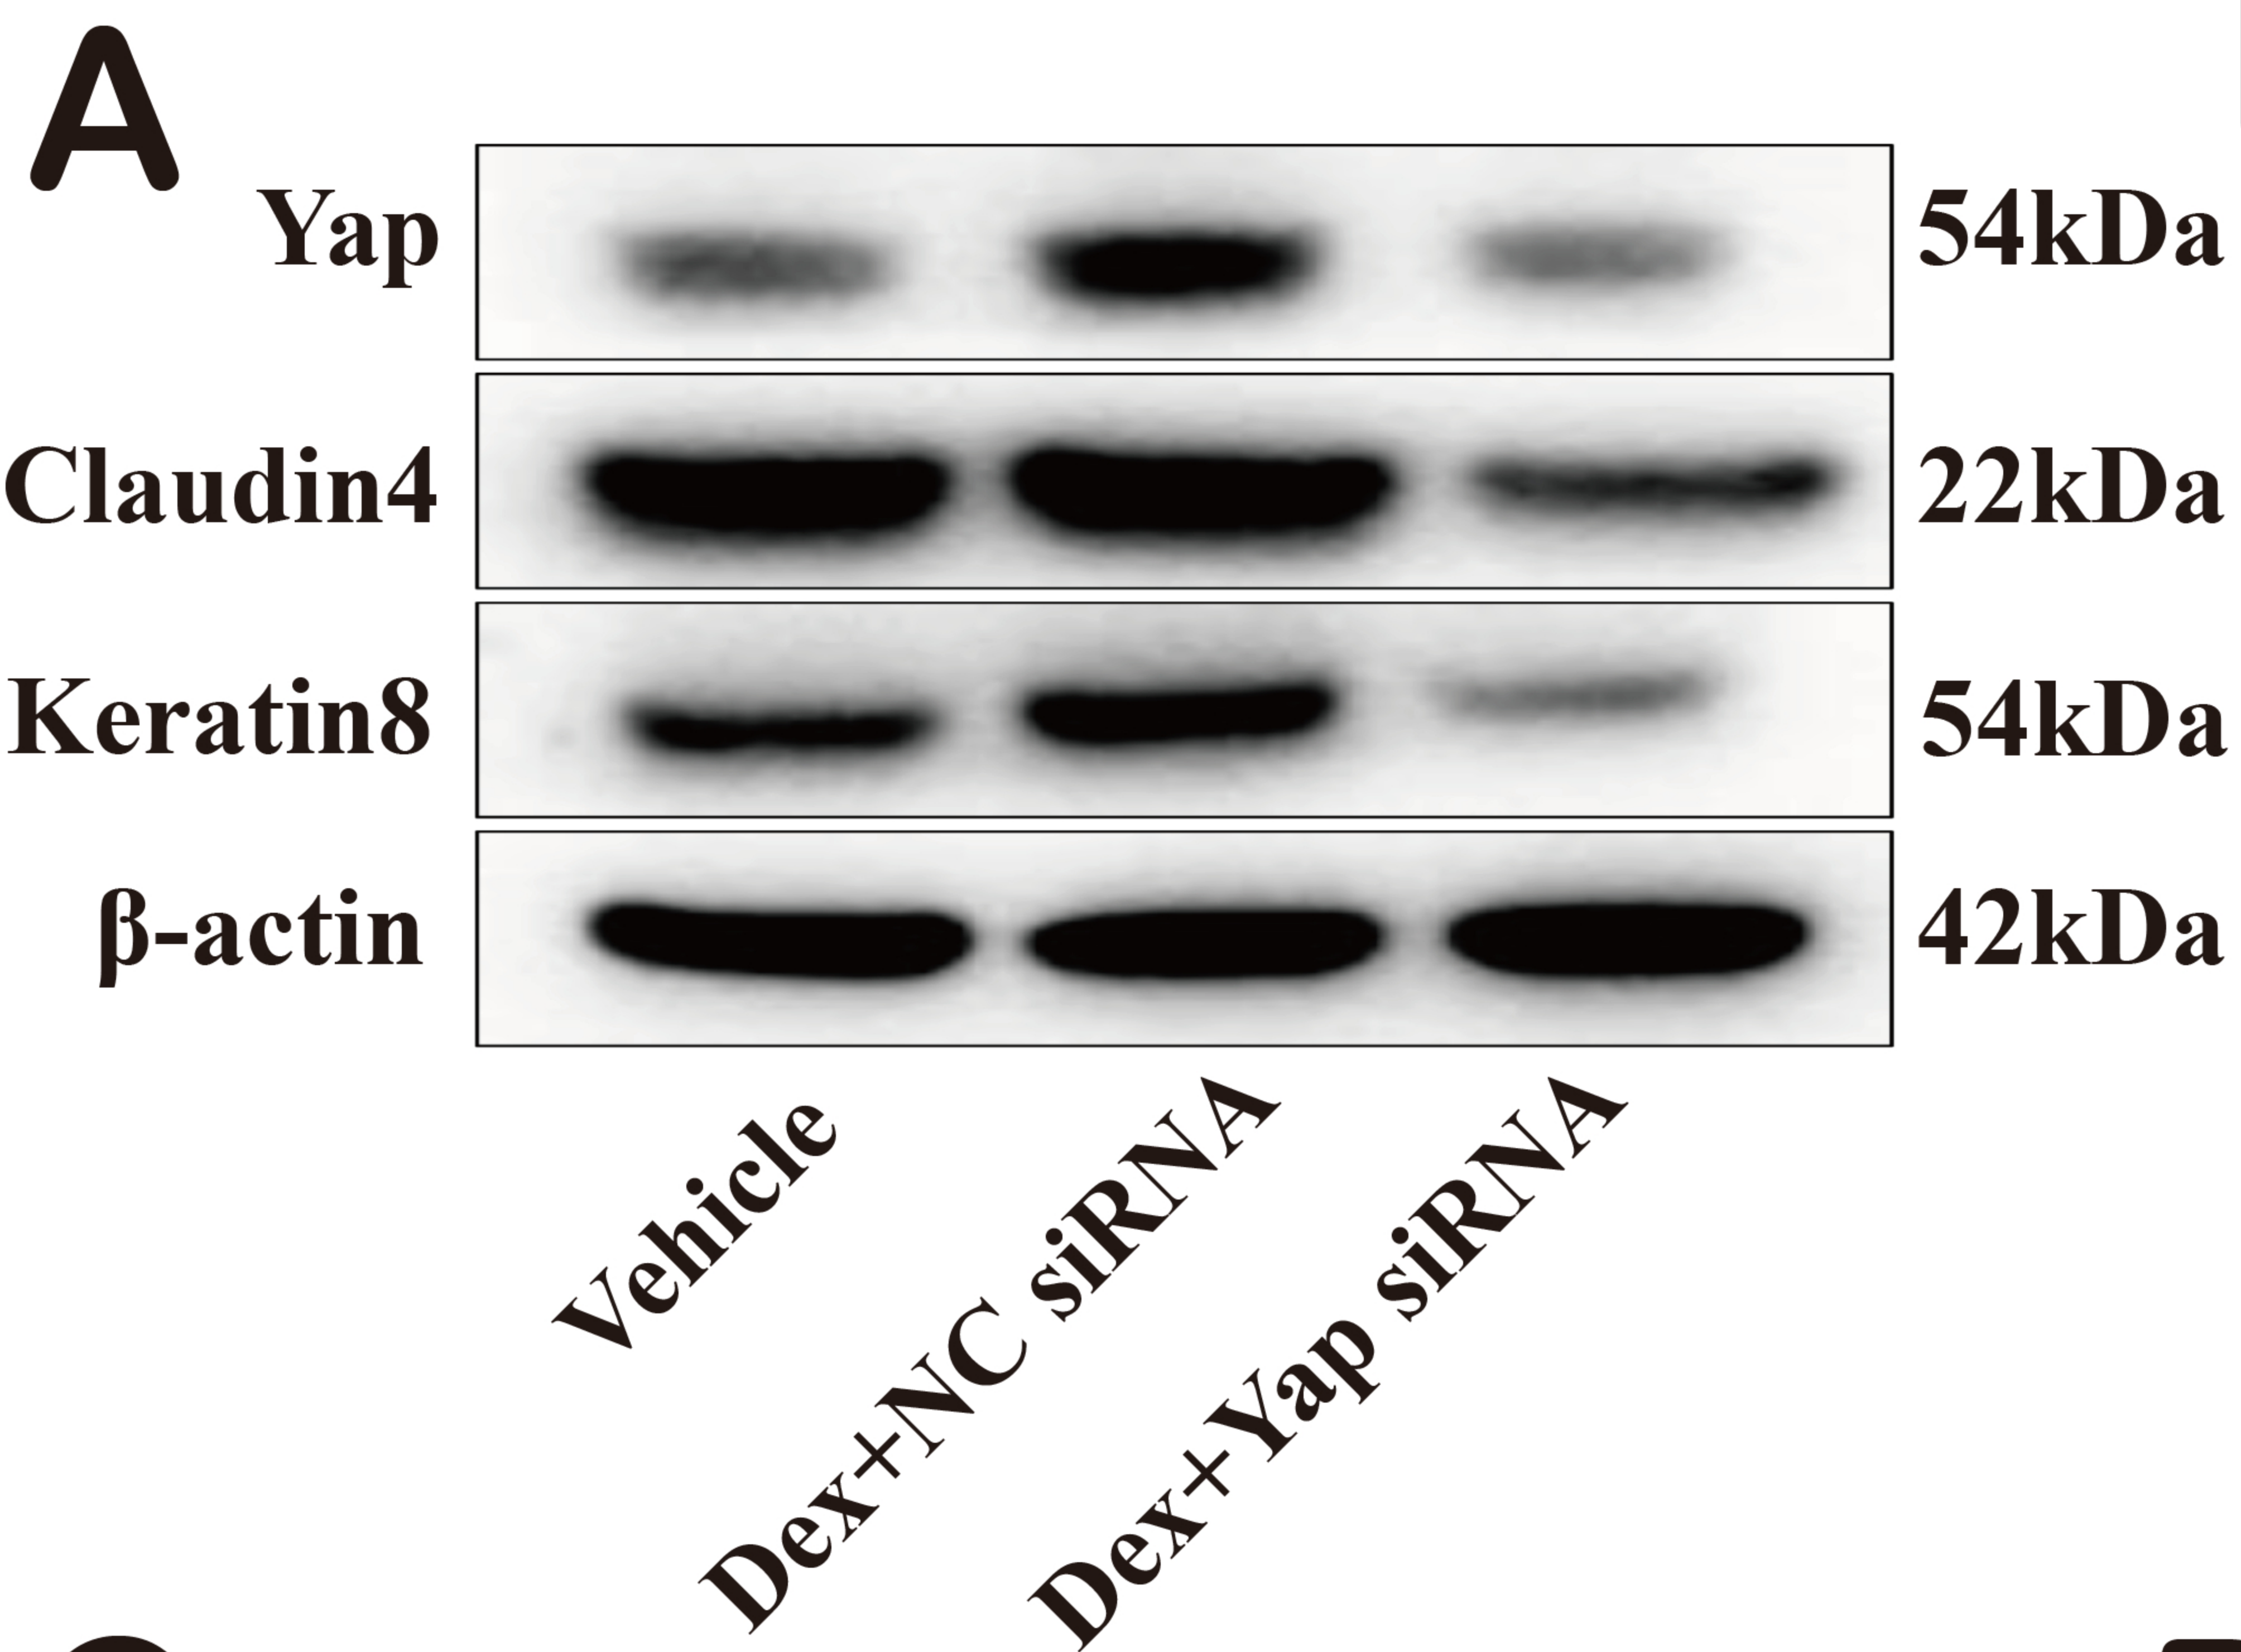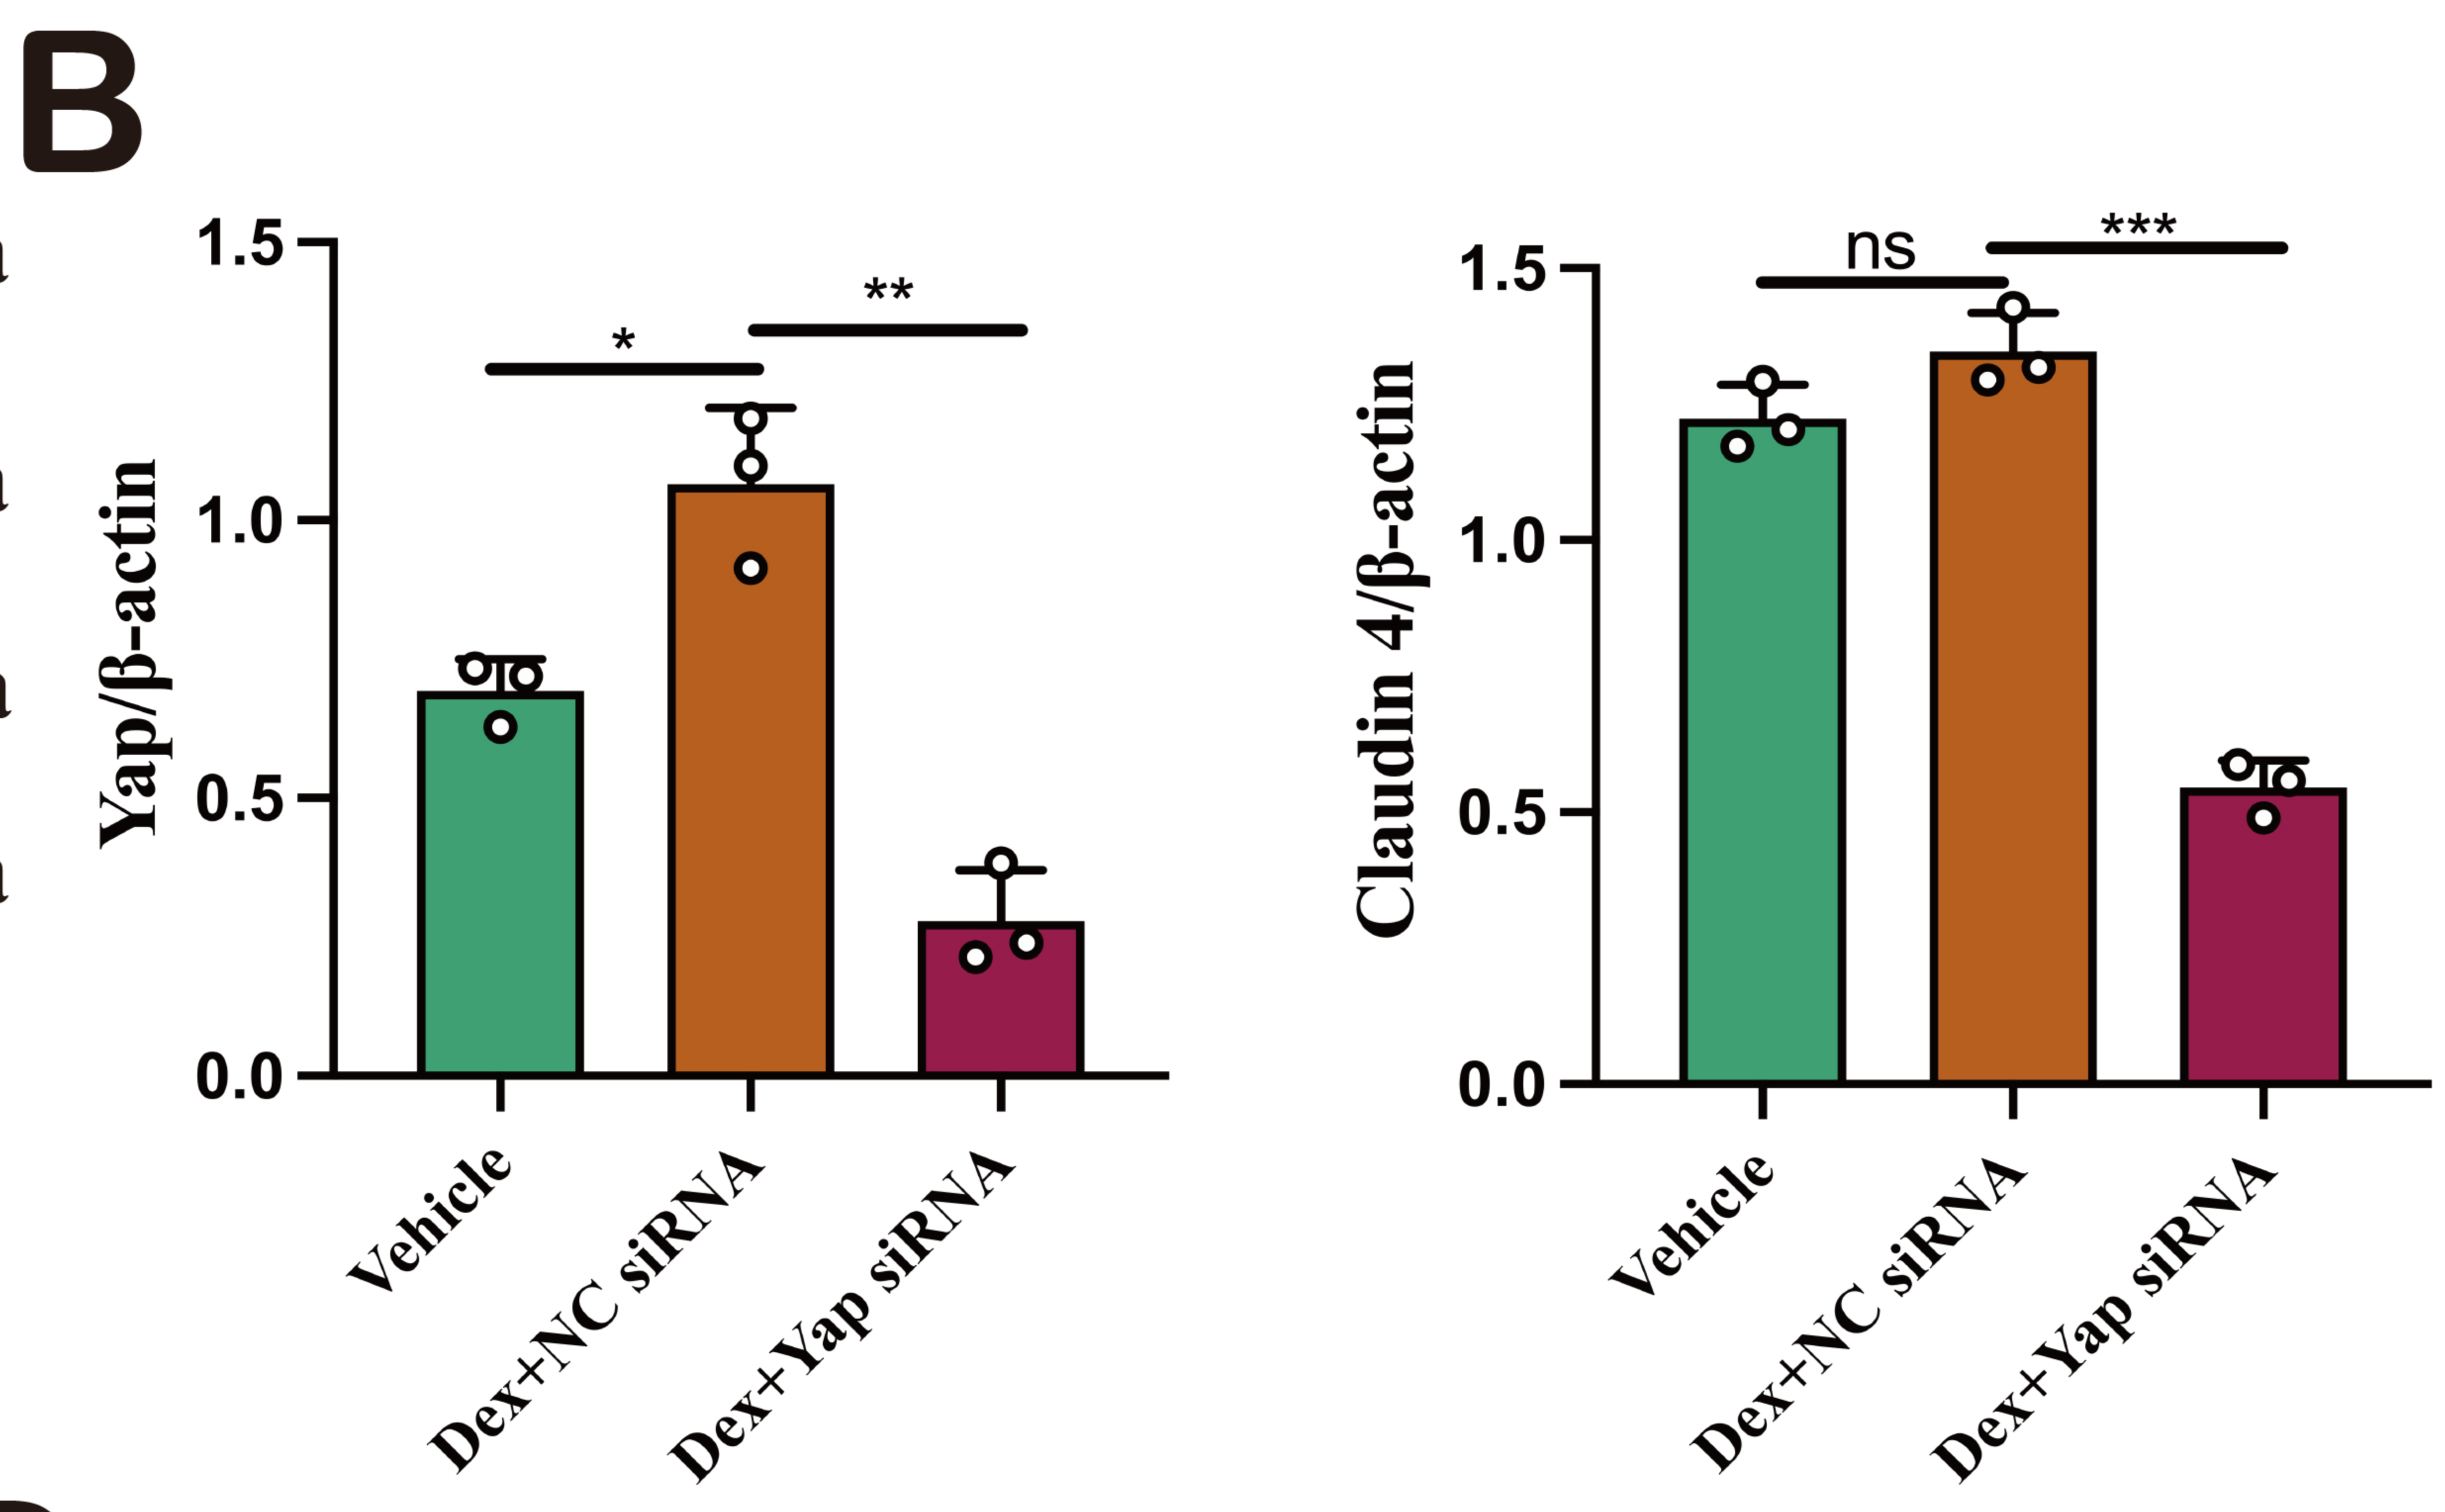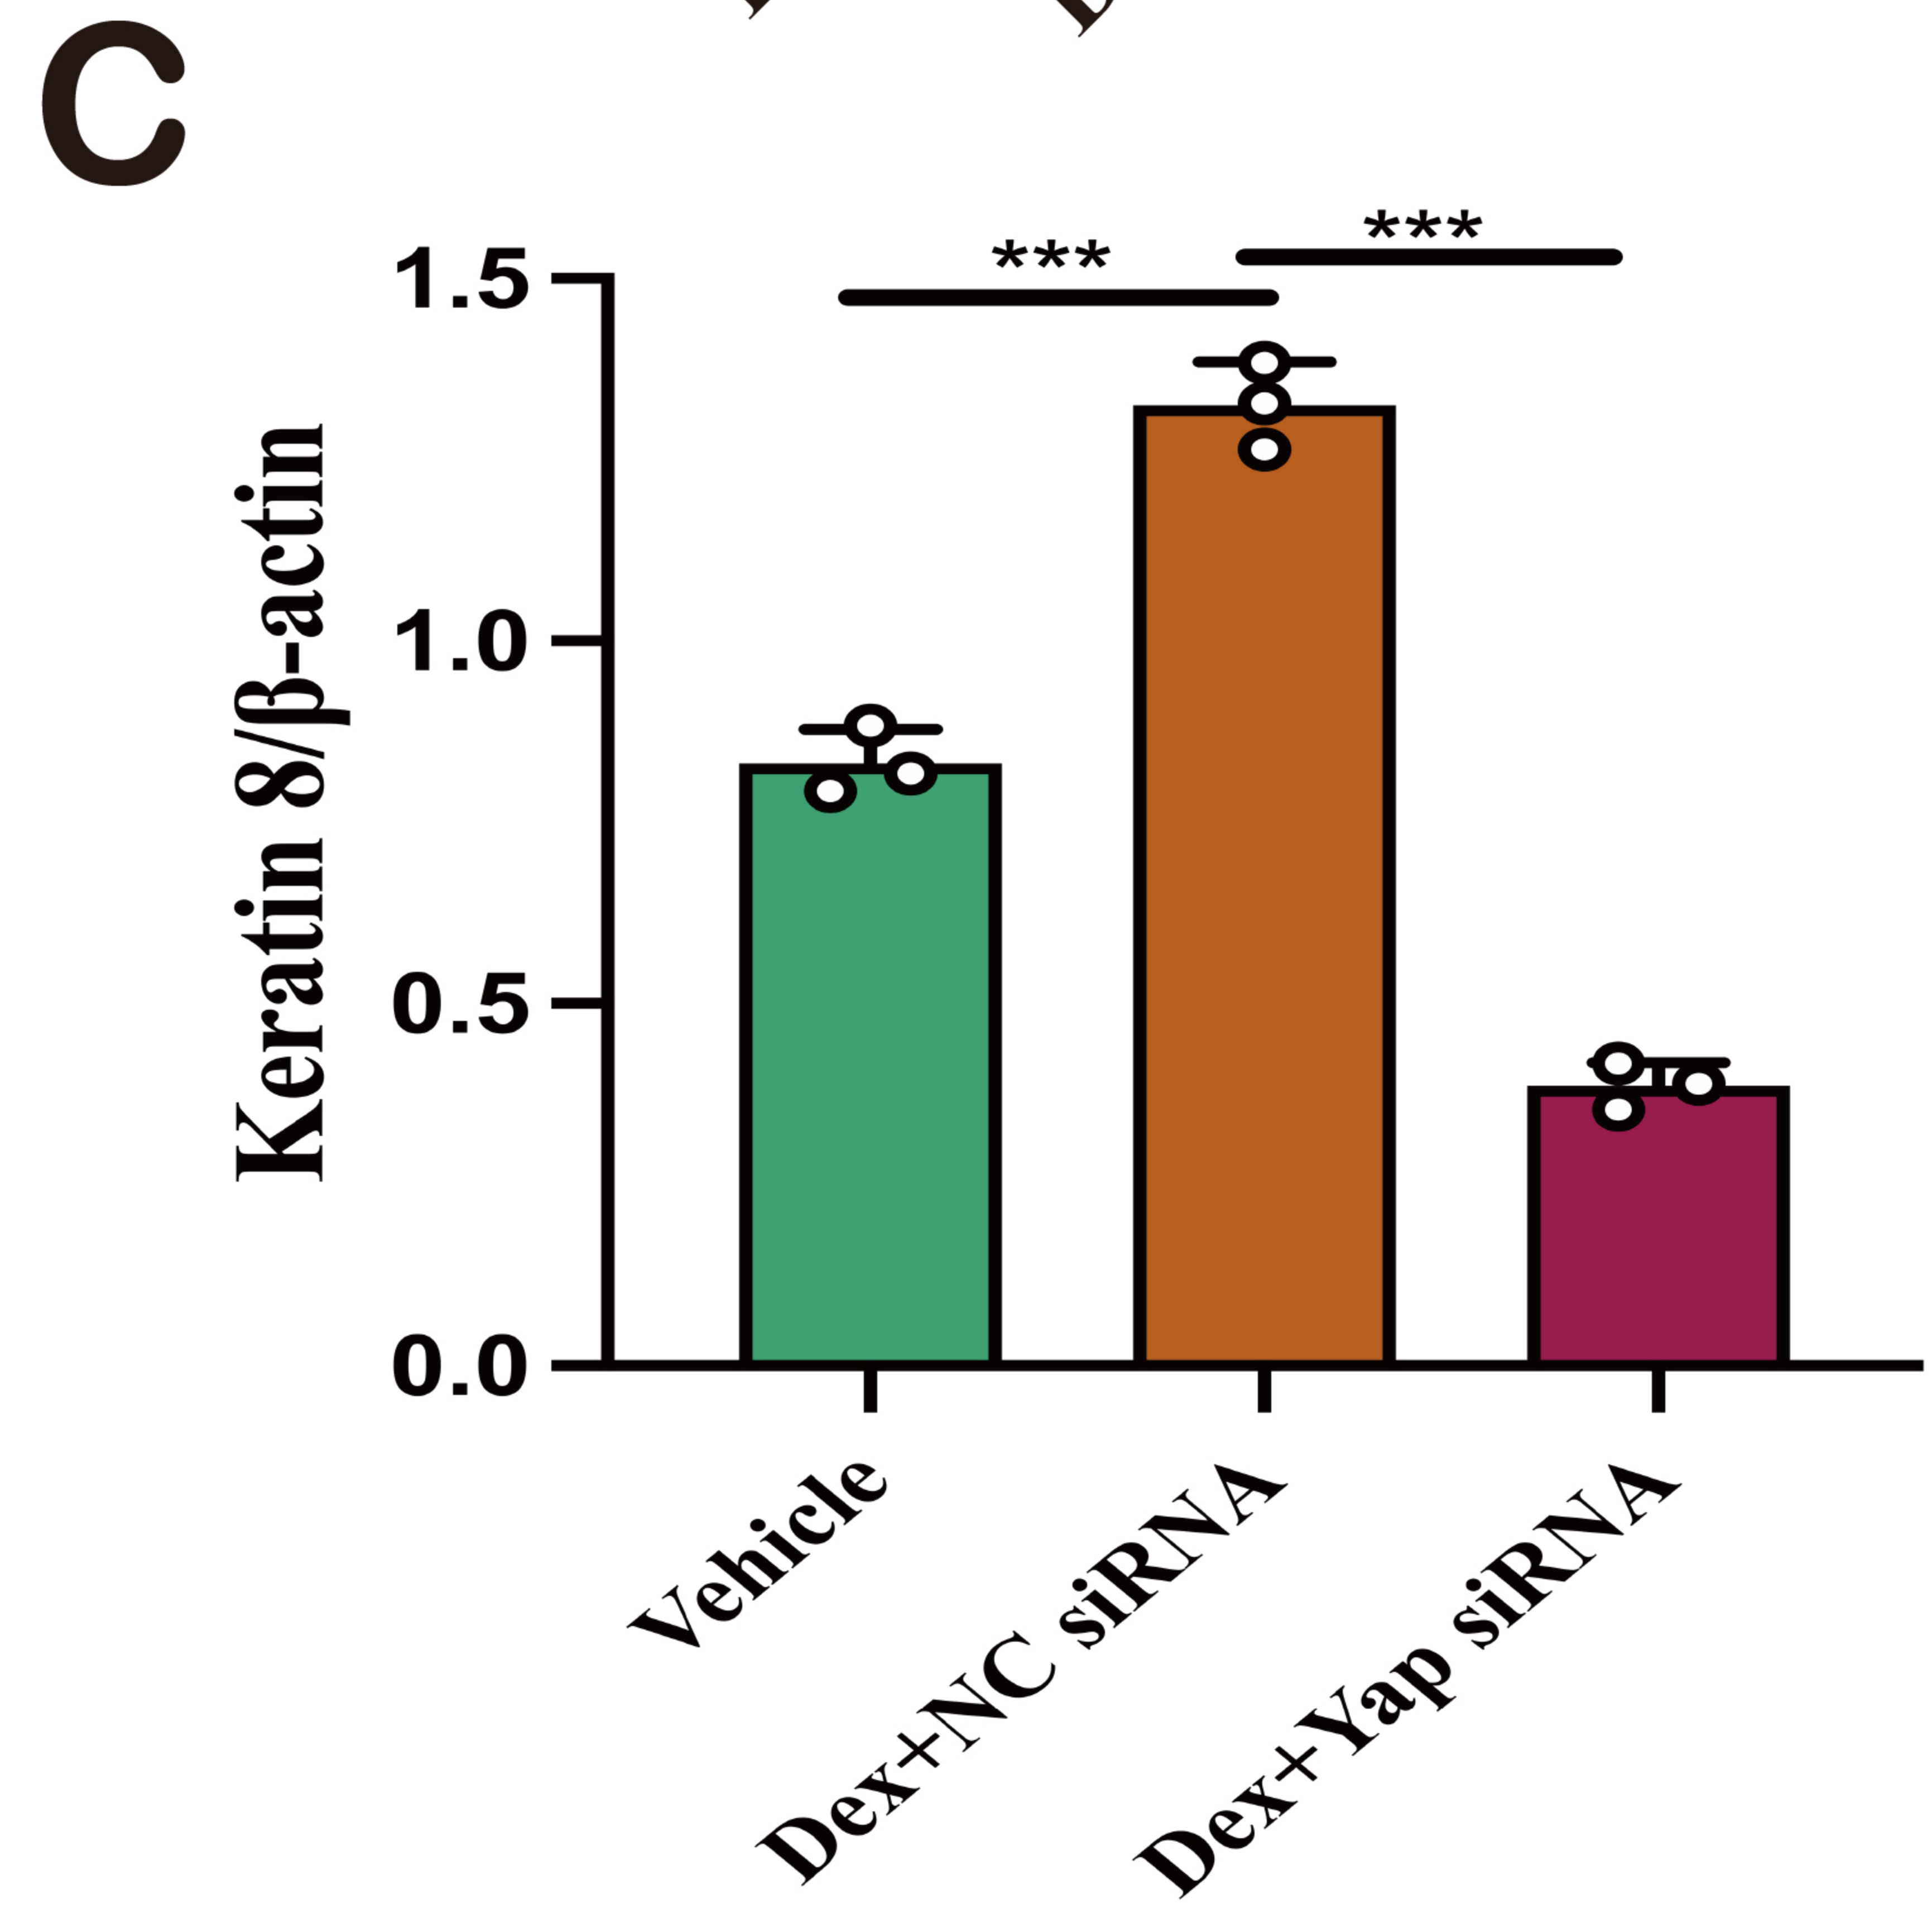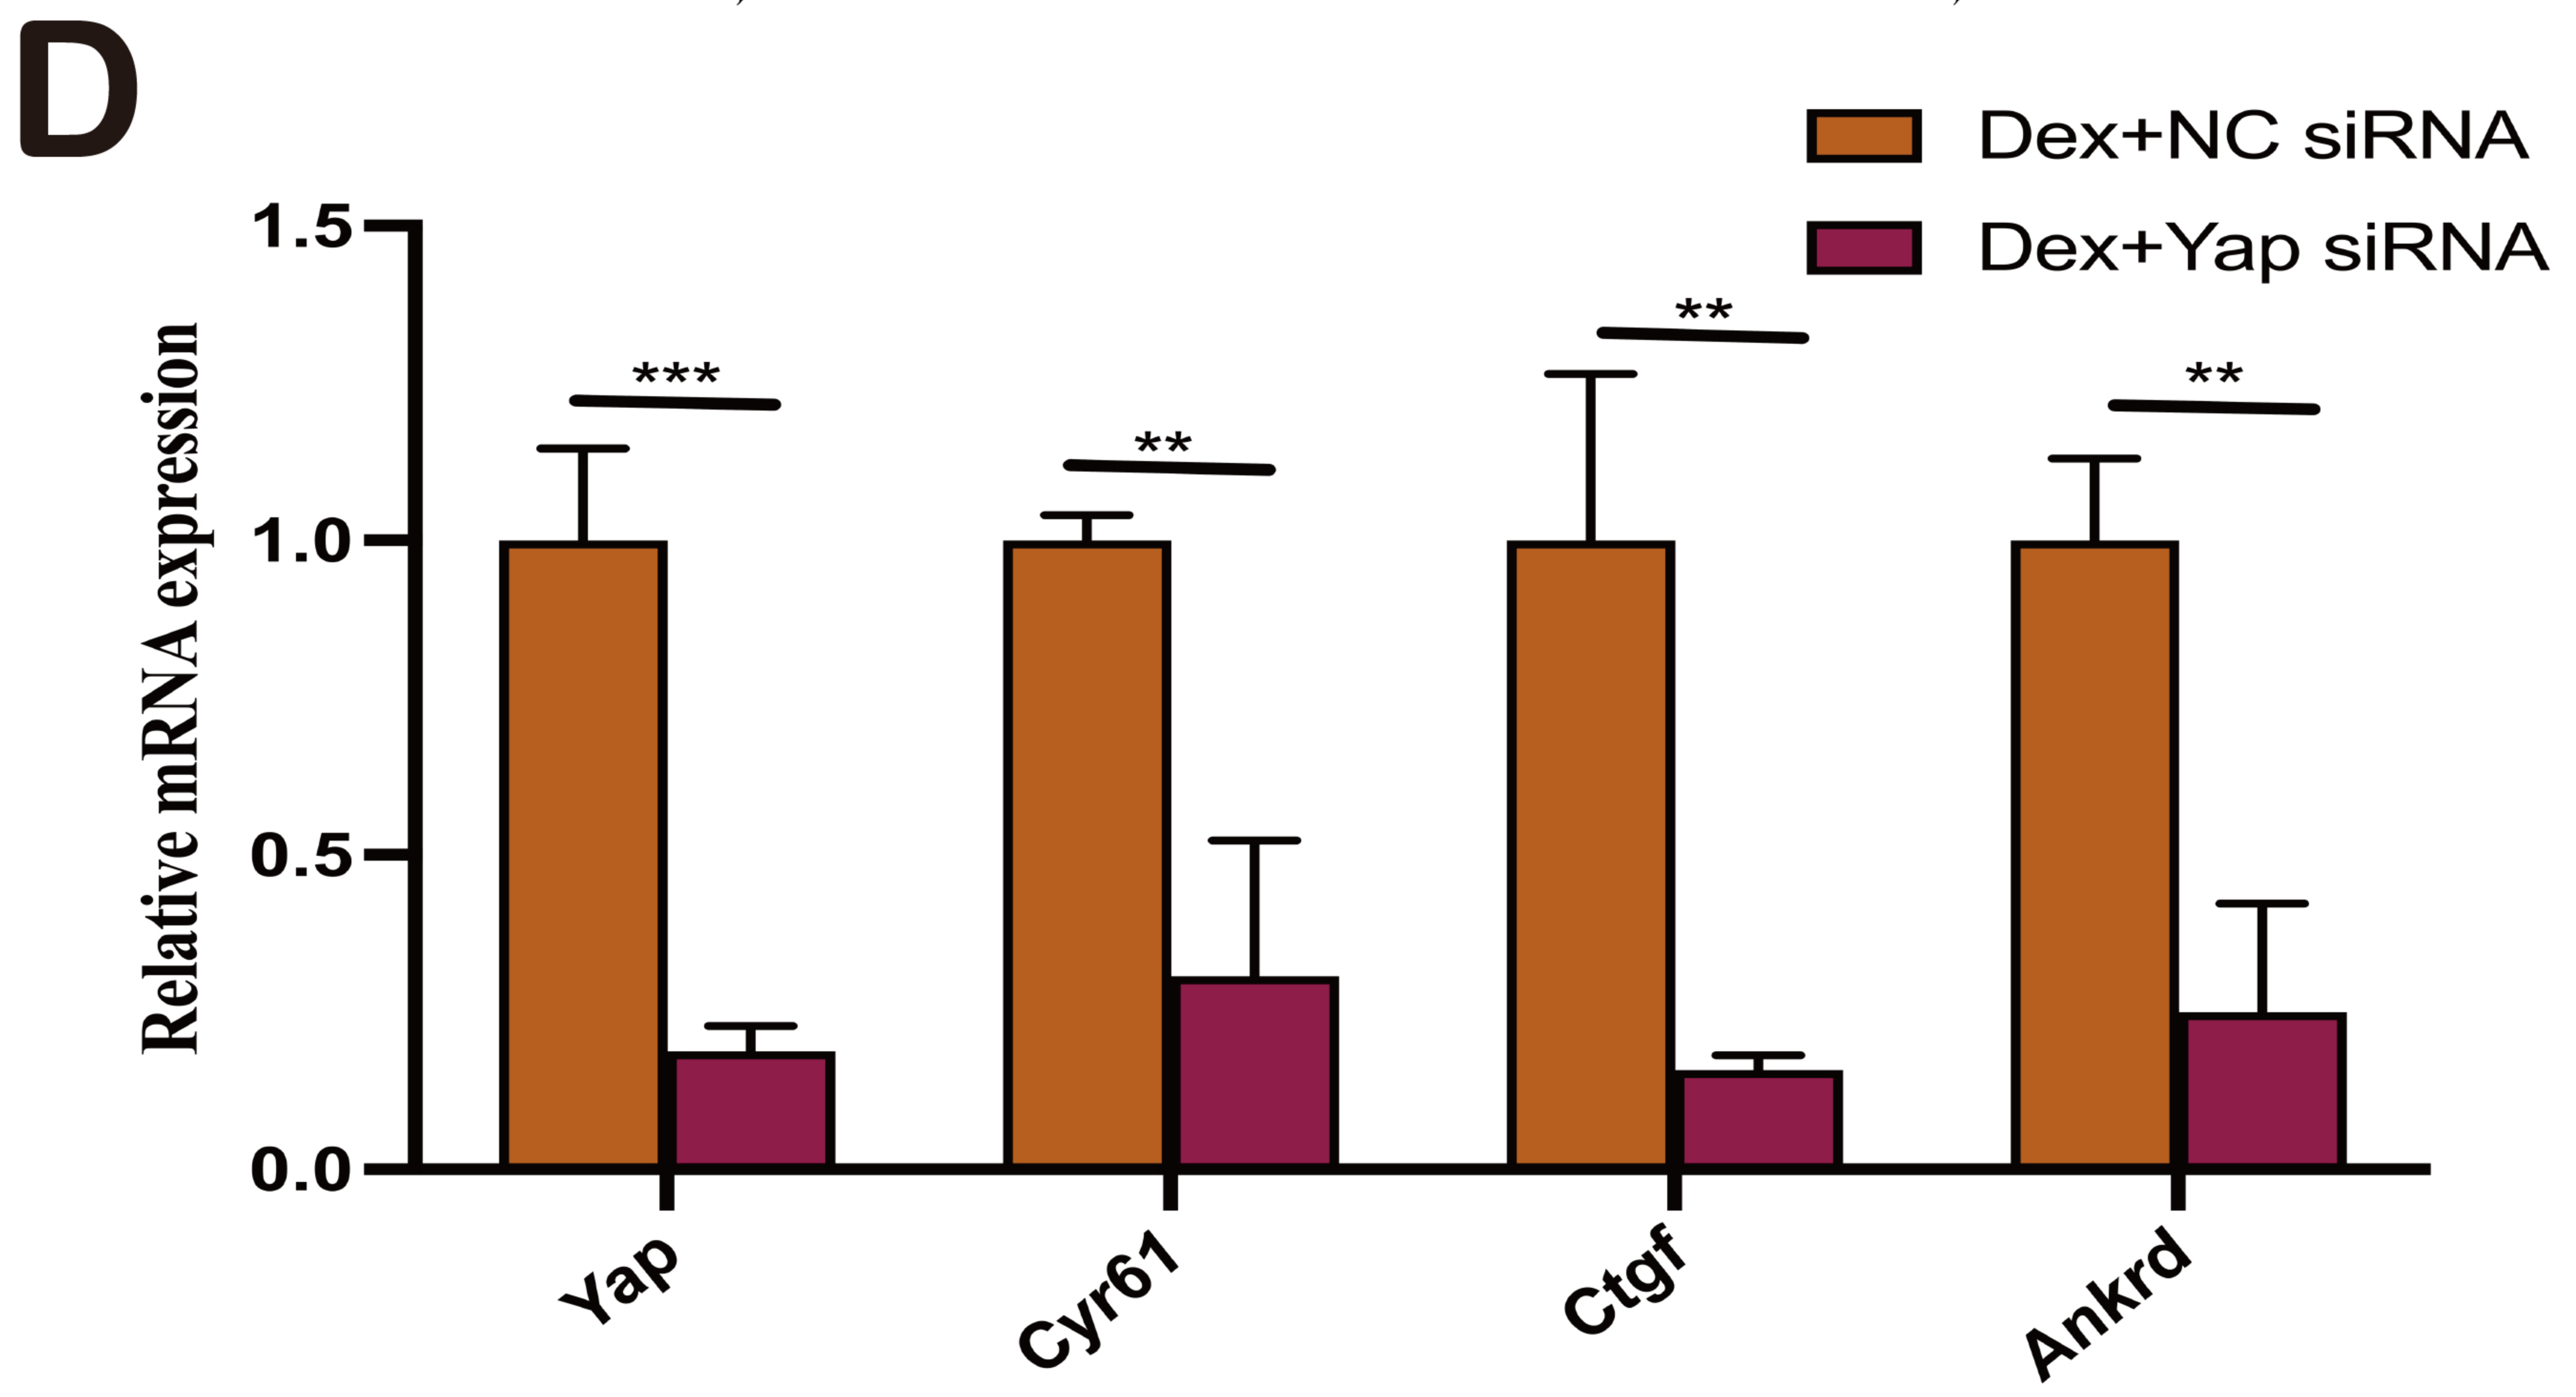

Supplement: bmjresp-11-1-s001.pdf [file bmjresp-11-1-s001.pdf]
